# Supplementary material for: JAM-A Acts via C/EBP-α to Promote Claudin-5 Expression and Enhance Endothelial Barrier Function
Source: PubMed Central journal article supplement — Circ Res. 2020 Jul 15;127(8):1056–73. doi: 10.1161/CIRCRESAHA.120.316742 (PMC7508279; doi:10.1161/circresaha.120.316742), 2020-07-15

**Full unedited gel for Figure 1B**

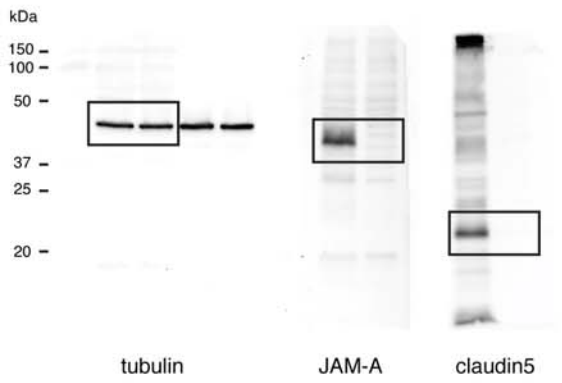

**Full unedited gel for Figure 2C**

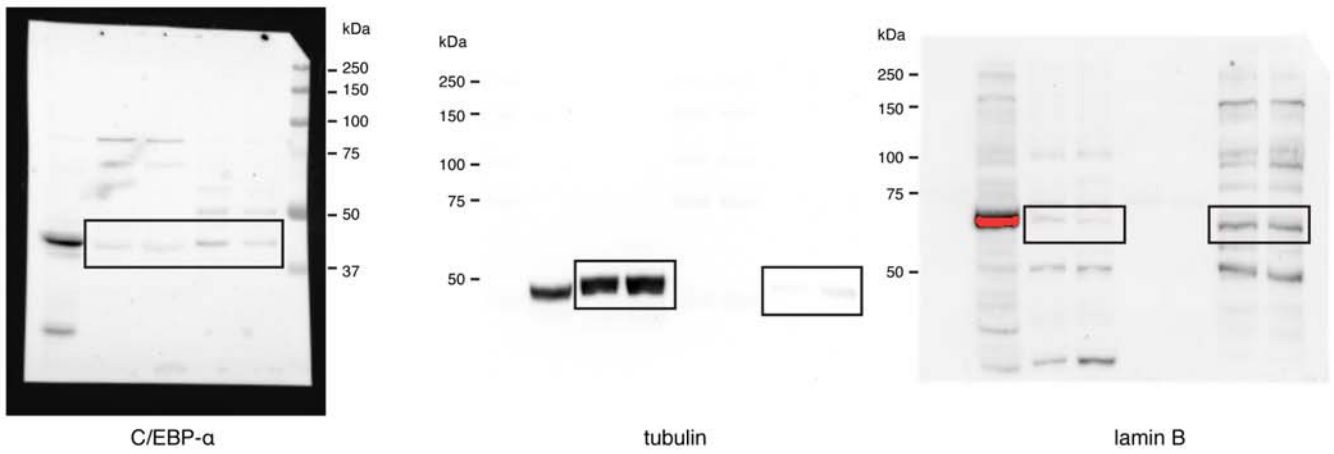

**Full unedited gel for Figure 2D**

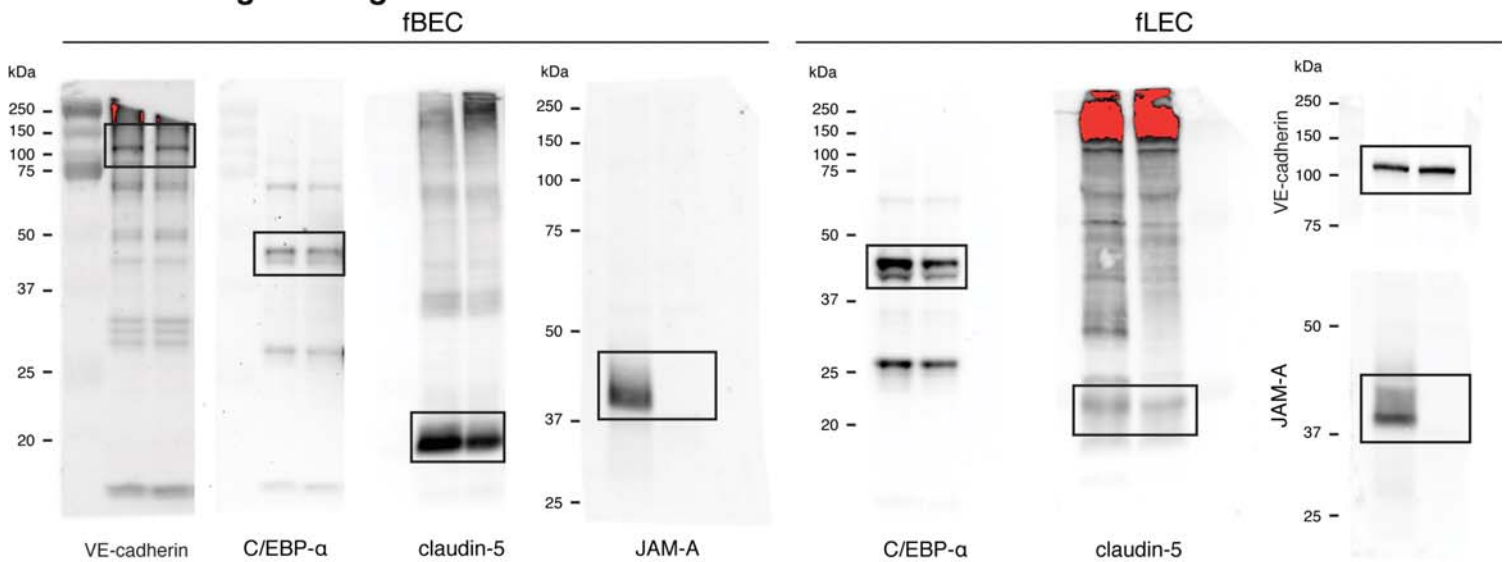

### Full unedited gel for Figure 3A

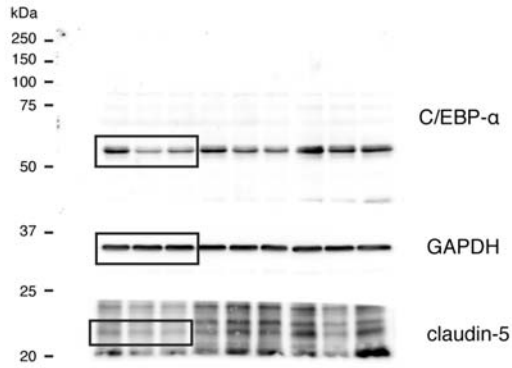

### Full unedited gel for Figure 3C

#### Upper panels

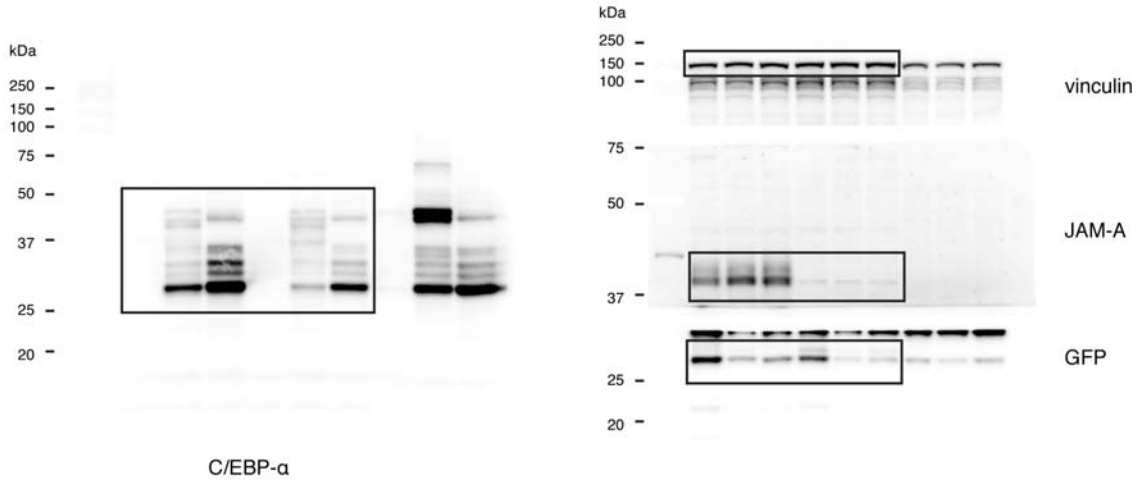

#### Lower panels

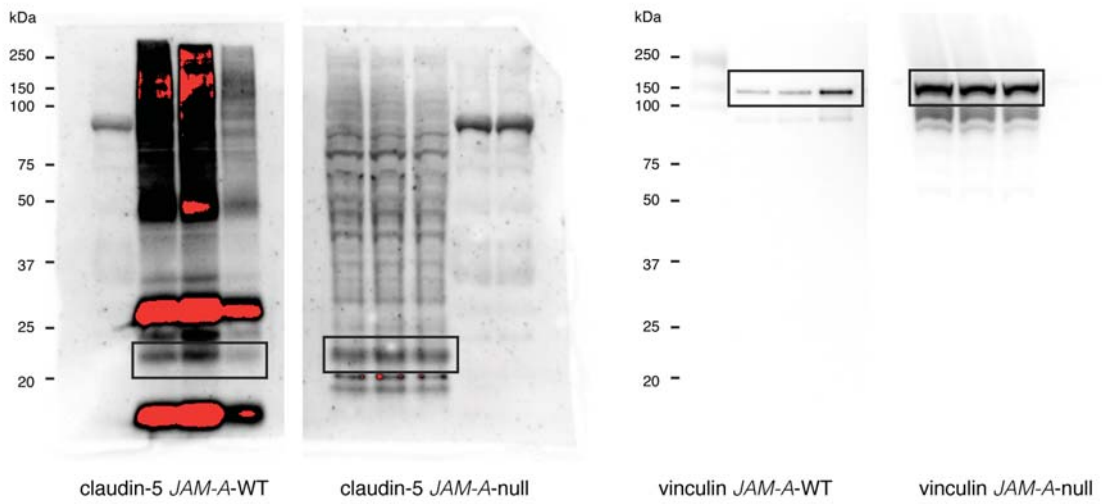

**Full unedited gel for Figure 4E**

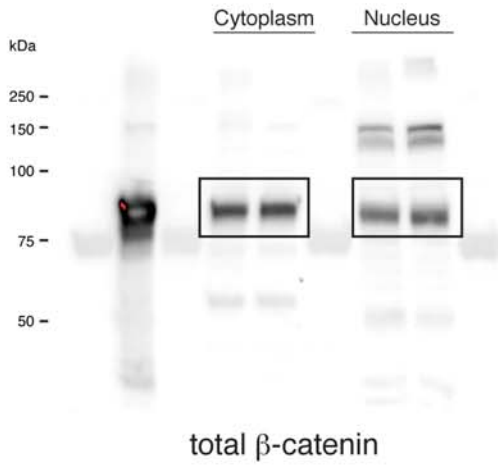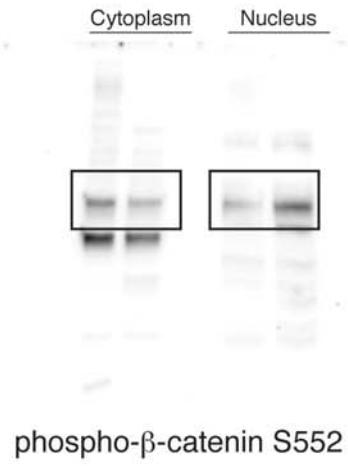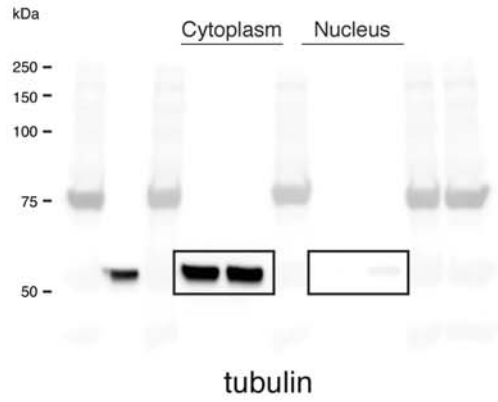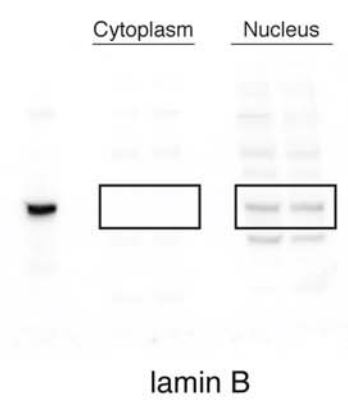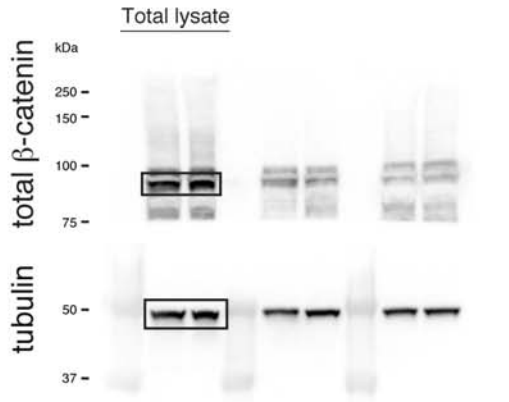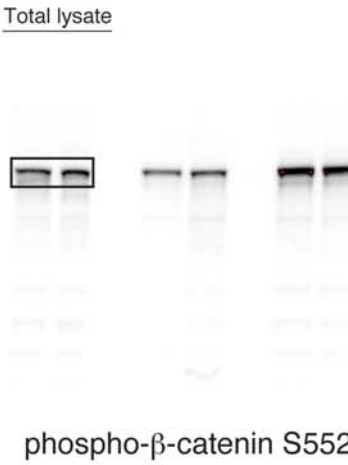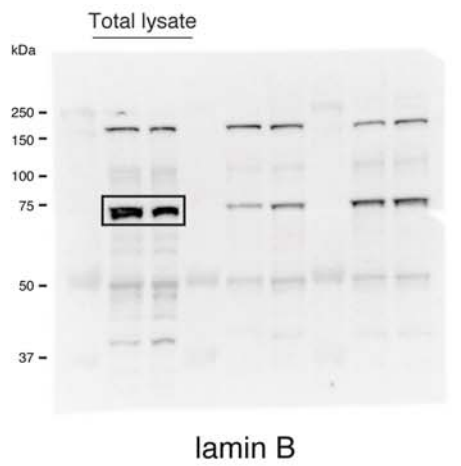

Full unedited gel for Online Figure IC

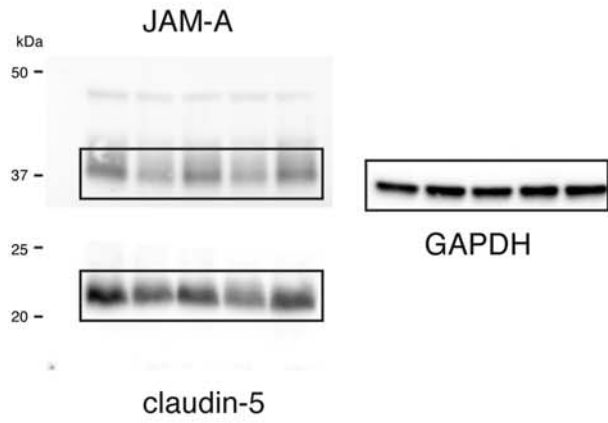

Full unedited gel for Online Figure IF

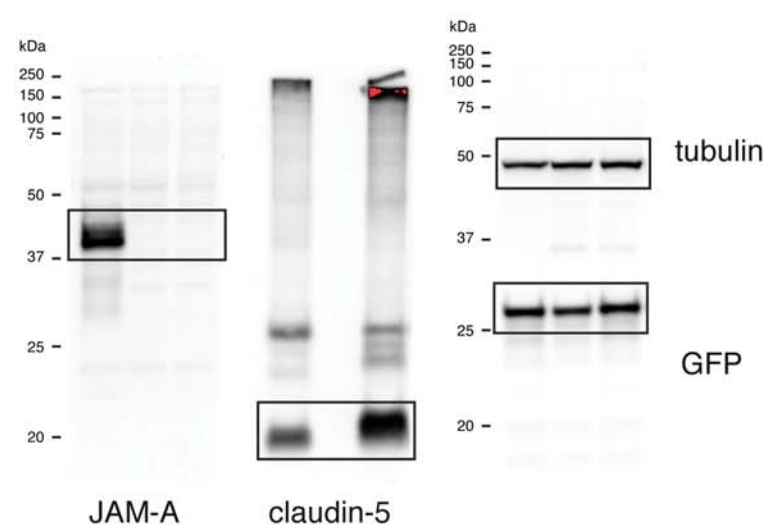

Full unedited gel for Online Figure IIA

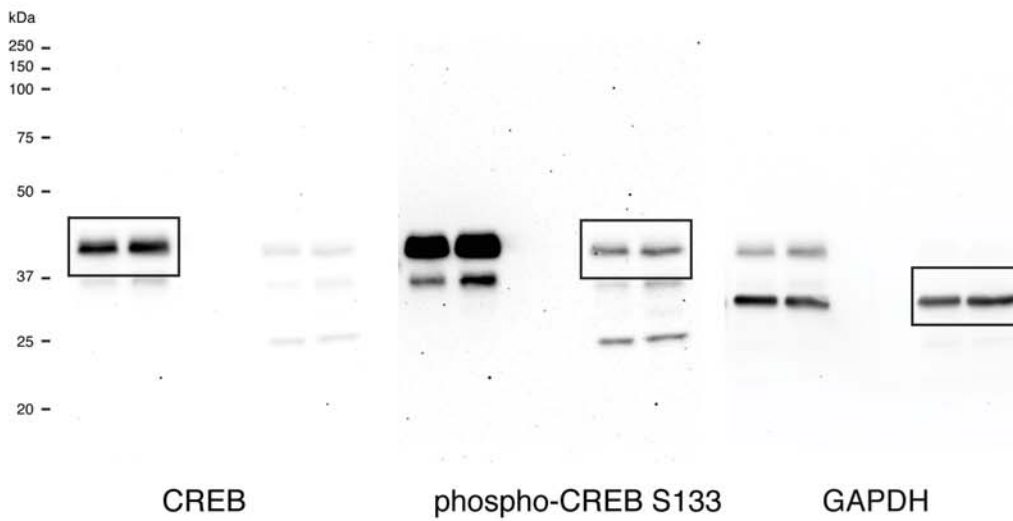

Full unedited gel for Online Figure IIC

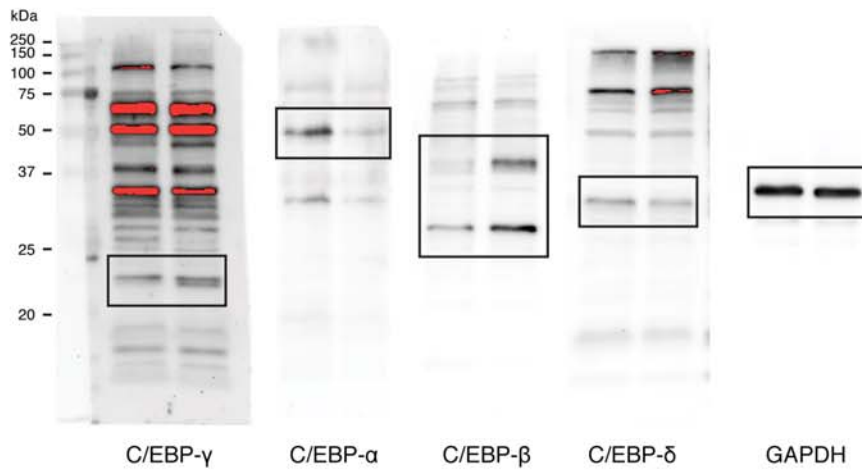

**Full unedited gel for Online Figure IIIB**

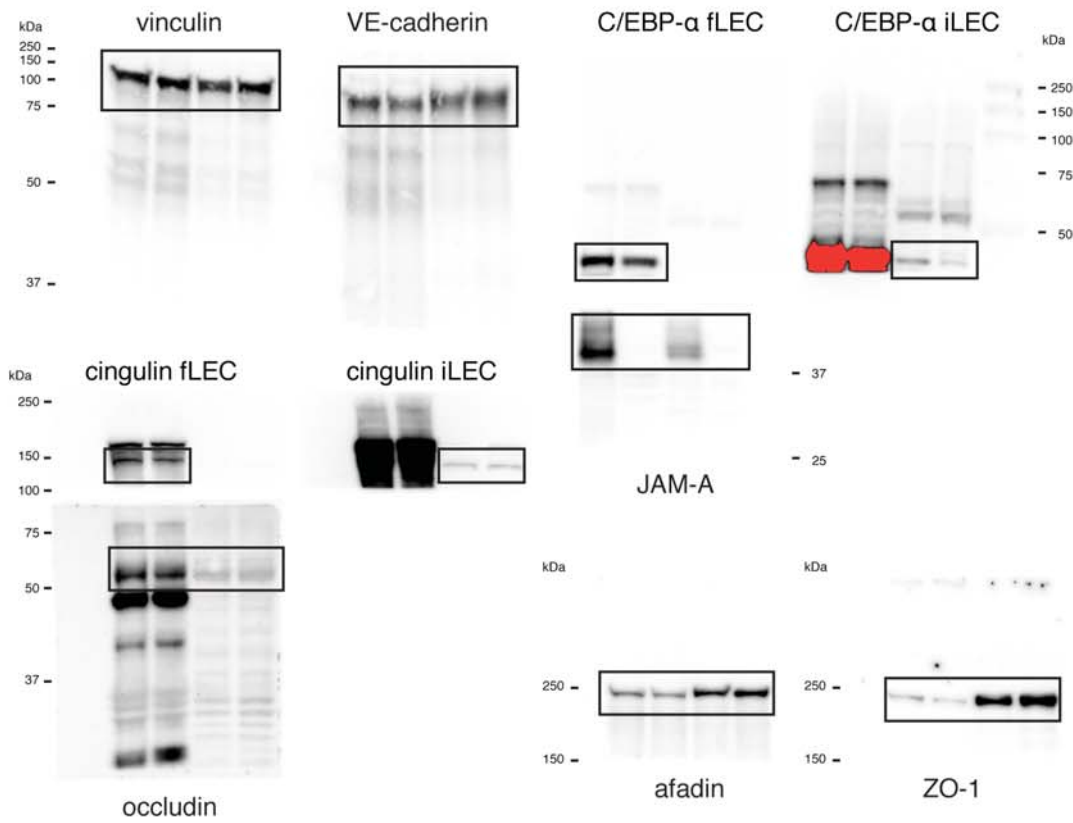

**Full unedited gel for Online Figure IIIC**

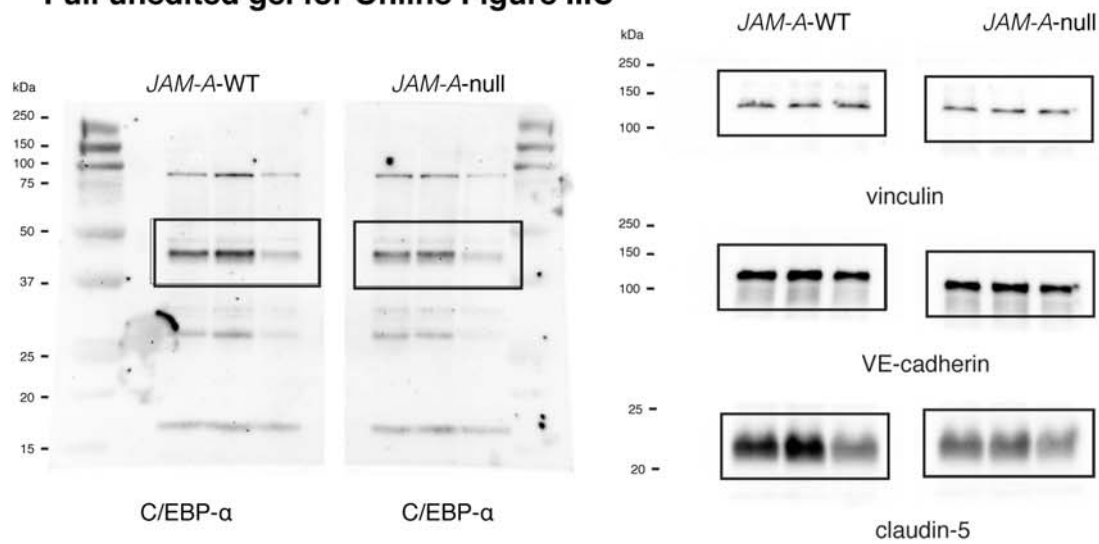

**Full unedited gel for Online Figure IIID**

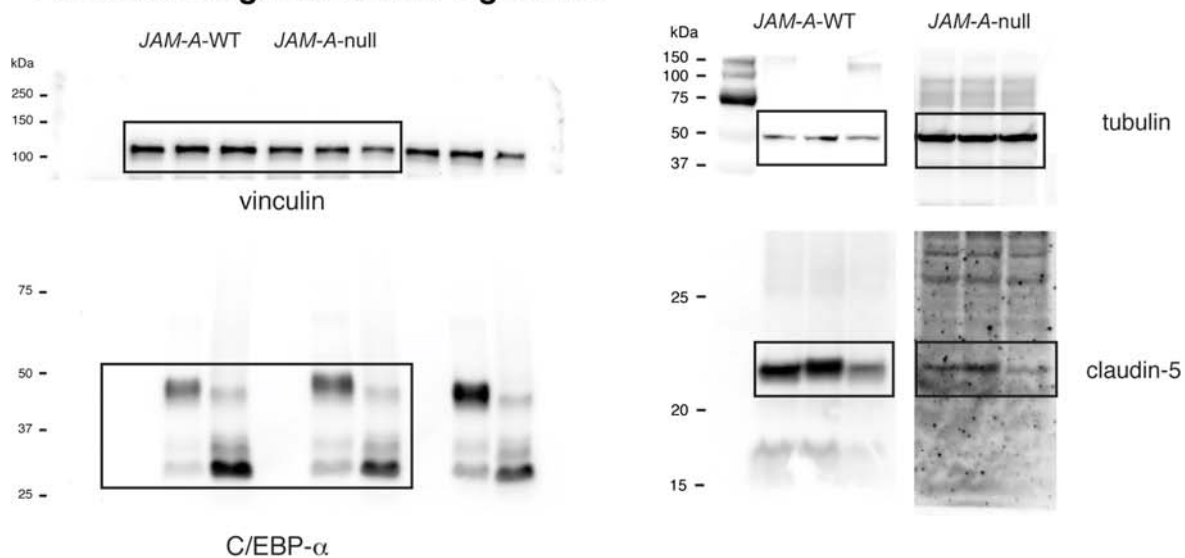

### Full unedited gel for Online Figure IVC

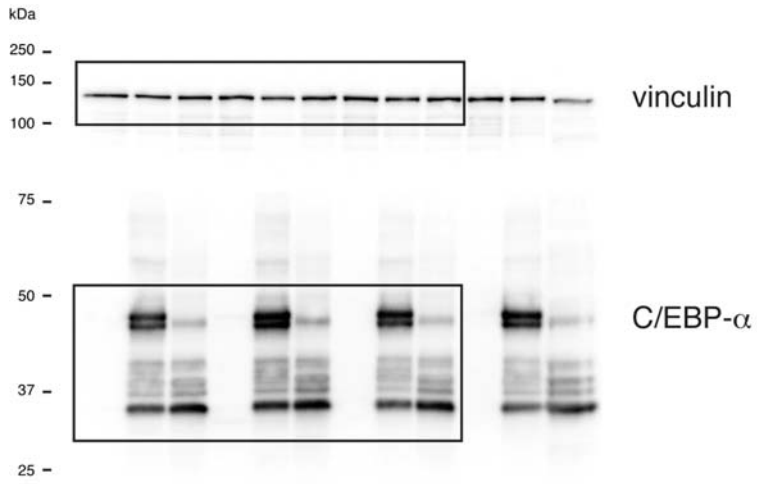

### Full unedited gel for Online Figure IVD

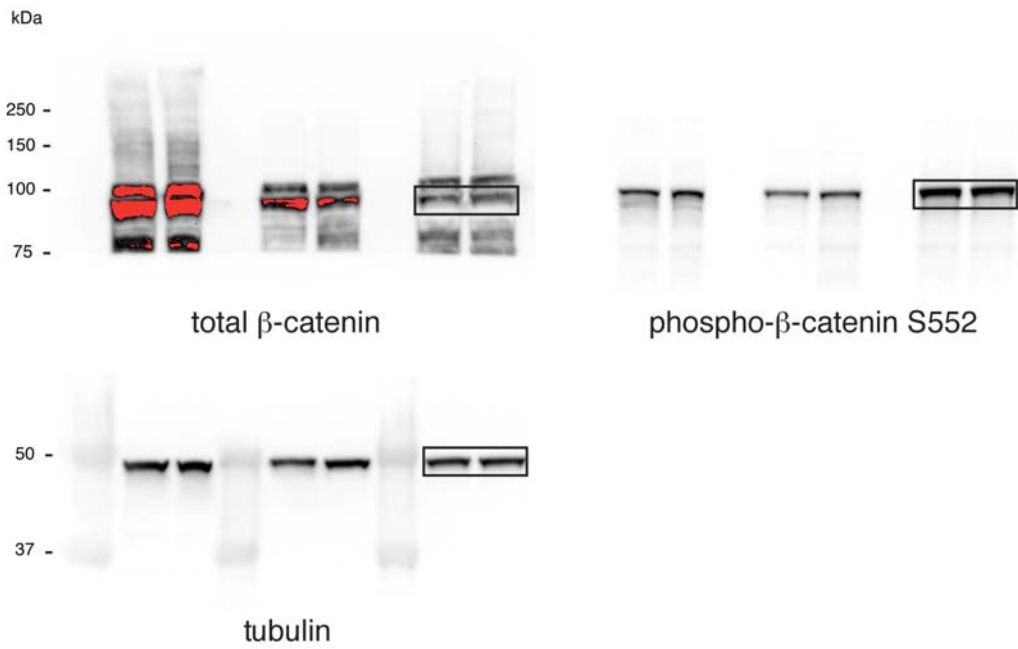

Supplement: res-127-1056-s006.pdf [file res-127-1056-s006.pdf]
