# Supplementary material for: JAM-A Acts via C/EBP-α to Promote Claudin-5 Expression and Enhance Endothelial Barrier Function
Source: PubMed Central journal article supplement — Circ Res. 2020 Jul 15;127(8):1056–73. doi: 10.1161/CIRCRESAHA.120.316742 (PMC7508279; doi:10.1161/circresaha.120.316742), 2020-07-15
Supplement: res-127-1056-s001.pdf [file res-127-1056-s001.pdf]

**From:** Lorenzo Bello [lorenzo.bello@unimi.it](mailto:lorenzo.bello@unimi.it)  
**Subject:** Re: written permission for Circulation Research  
**Date:** 28 Apr 2020 17:13  
**To:** Monica Giannotta [monica.giannotta@ifom.eu](mailto:monica.giannotta@ifom.eu)

LB

I give the permission to the corresponding author Dr. Monica Giannotta to be named in the manuscript entitled, “**JAM-A acts via C/EBP- $\alpha$  to promote claudin-5 expression and enhance endothelial barrier function**” by Kakogiannos N. *et al.* (CIRCRES/2020/316742D)

regards

Lorenzo Bello

-----  
Lorenzo Bello  
Professore Ordinario di Neurochirurgia  
Dipartimento di Oncologia ed Emato-Oncologia  
Università degli Studi di Milano

Il giorno 28 apr 2020, alle ore 17:08, Monica Giannotta <[monica.giannotta@ifom.eu](mailto:monica.giannotta@ifom.eu)> ha scritto:

Caro Dr. Bello,

mi scusi se la sto disturbando, poiche' e' stato ringraziato nella sezione degli Acknowledgments (vedi allegato) nel nostro manoscritto (vedi allegato) ti chiederei un permesso scritto di essere nominato.

All persons named in the Acknowledgments section have provided the corresponding author with written permission to be named in the manuscript;

Allego il manoscritto e una possibile frase da mettere nella dichiarazione. Va bene anche una sua mail.

I give the permission to the corresponding author Dr. Monica Giannotta to be named in the manuscript entitled, “**JAM-A acts via C/EBP- $\alpha$  to promote claudin-5 expression and enhance endothelial barrier function**” by Kakogiannos N. *et al.* (CIRCRES/2020/316742D)

La ringrazio per la collaborazione

Cordiali saluti  
MG

-----  
Monica Giannotta, PhD  
New strategies to inhibit tumor angiogenesis research unit

IFOM, The FIRC Institute for Molecular Oncology  
Via Adamello 16 - 20139 Milan Italy  
Tel.+39.02.574.303.327  
Fax.+39.02.574.303.231

Website: [www.ifom.eu](http://www.ifom.eu)

**For the attention of:**  
**Editorial Office**  
***Circulation Research***

**To whom it may concern:**

I hereby confirm that the corresponding author Dr Monica Giannotta has been given my permission for me to be named in the Acknowledgements of manuscript number **CIRCRES/2020/316742D** on the basis of the editorial assistance I have provided.

**Title**

**JAM-A acts via C/EBP- $\alpha$  to promote claudin-5 expression and enhance endothelial barrier function**

**Authors**

Nikolaos Kakogiannos, Laura Ferrari, Costanza Giampietro, Anna Agata Scalise, Claudio Maderna, Micol Rava', Andrea Taddei, Maria Grazia Lampugnani, Federica Pisati, Matteo Malinverno, Emanuele Martini, Iliaria Costa, Michela Lupia, Ugo Cavallaro, Galina V. Beznoussenko, Alexander A. Mironov, Bethania Fernandes, Noemi Rudini, Elisabetta Dejana and Monica Giannotta

**Affiliation of corresponding author**

FIRC Institute of Molecular Oncology, Milan, Italy

Should the Editorial Office or the Editor of the *Circulation Research* require any further information or comment, I can be contacted directly at: [berrie.christopher@libero.it](mailto:berrie.christopher@libero.it).

**Date:** 28 April, 2020

**Signed:**



**Christopher Paul Berrie, MPhil, MA (Cantab), PhD**

Freelance Scientific English Editor  
Via Emilio Casella, 49  
65012 Cepagatti (PE)  
Italy

**From:** Binelli Giorgio Pietro Mario [giorgio.binelli@uninsubria.it](mailto:giorgio.binelli@uninsubria.it)  
**Subject:** Permission to be acknowledged  
**Date:** 8 Jul 2020 09:02  
**To:** [monica.giannotta@ifom.eu](mailto:monica.giannotta@ifom.eu)

---

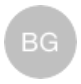

Dear Monica,

please find below my permission to be acknowledged.  
"I give the permission to the corresponding author Dr. Monica Giannotta to be named in the manuscript entitled "JAM-A acts via C/EBP- $\alpha$  to promote claudin-5 expression and enhance endothelial barrier function" by Kakogiannos N. et al., CIRCRES/2020/316742D)".  
Thank you. With my best regards,

Giorgio Binelli

**From:** Amanda Oldani amanda.oldani@ifom.eu  
**Subject:** acknowledgement permission  
**Date:** 28 Apr 2020 22:32  
**To:** monica.giannotta@ifom.eu

---

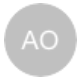

To whom it may concern,  
I give the permission to the corresponding author Dr. Monica Giannotta to be named in the manuscript entitled, "JAM-A acts via C/EBP- $\alpha$  to promote claudin-5 expression and enhance endothelial barrier function" by Kakogiannos N. et al. (CIRCRES/2020/316742D).  
Sincerely,  
Amanda Oldani

--

Amanda Oldani, PhD  
Imaging Technological Development Unit  
Fondazione IFOM-Istituto FIRC di Oncologia Molecolare  
via Adamello 16  
20139 Milan  
Italy  
Phone: 02-574303860  
E-mail: amanda.oldani@ifom.eu

**From:** Fabrizio Orsenigo [fabrizio.orsenigo@ifom.eu](mailto:fabrizio.orsenigo@ifom.eu)  
**Subject:** Written permission  
**Date:** 28 Apr 2020 18:11  
**To:** Monica Giannotta [monica.giannotta@ifom.eu](mailto:monica.giannotta@ifom.eu)

---

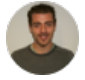

I give the permission to the corresponding author Dr. Monica Giannotta to be named in the manuscript entitled, “**JAM-A acts via C/EBP- $\alpha$  to promote claudin-5 expression and enhance endothelial barrier function**” by Kakogiannos N. *et al.* (CIRCRES/2020/316742D)

Fabrizio Orsenigo

**From:** Fontijn, R.D. r.fontijn@amsterdamumc.nl  
**Subject:** Re: claudin 5 constructs  
**Date:** 29 Apr 2020 08:48  
**To:** Monica Giannotta monica.giannotta@ifom.eu

FR

Dear Monica,

Of course I happily agree, and wish you good luck submitting

best,  
Ruud Fontijn

more formal:

I give the permission to the corresponding author Dr. Monica Giannotta to be named in the manuscript entitled, "**JAM-A acts via C/EBP- $\alpha$  to promote claudin-5 expression and enhance endothelial barrier function**" by Kakogiannos N. *et al.* (CIRCRES/2020/316742D)

**Dr. Ruud Fontijn | Researcher | BSO**  
Molecular Cell Biology and Immunology  
Location VUmc | OI2 building, room 11E41 | De Boelelaan 1108, 1081HZ Amsterdam  
T: +31204448080 (secretariat) +31204441002 (Ruud) | E: r.fontijn@vumc.nl  
Absent: friday

---

**Van:** Monica Giannotta <monica.giannotta@ifom.eu>

**Verzonden:** dinsdag 28 april 2020 17:20

**Aan:** Fontijn, R.D. <r.fontijn@amsterdamumc.nl>

**Onderwerp:** claudin 5 constructs

Dear Ruud,  
sorry if I disturb you.

We are ready to submit a manuscript where I used your constructs that you kindly provided 9 years ago.

Since I mention your name in the acknowledgements, all persons must provide the corresponding author with written permission to be named in the manuscript.

Could you send me an email with your written consent?

I give the permission to the corresponding author Dr. Monica Giannotta to be named in the manuscript entitled, "**JAM-A acts via C/EBP- $\alpha$  to promote claudin-5 expression and enhance endothelial barrier function**" by Kakogiannos N. *et al.* (CIRCRES/2020/316742D)

Thanks for the collaboration

Best regards  
MG

---

Monica Giannotta, PhD  
New strategies to inhibit tumor angiogenesis research unit  
IFOM, The FIRC Institute for Molecular Oncology  
Via Adamello 16 - 20139 Milan Italy  
Tel.+39.02.574.303.327  
Fax.+39.02.574.303.231

Website: [www.ifom.eu](http://www.ifom.eu)

On 06 May 2011, at 08:29, Fontijn, R.D. <[r.fontijn@vumc.nl](mailto:r.fontijn@vumc.nl)> wrote:

Hi Monica,

You're right, we used EcoRI and PstI

Best,  
Ruud

R.D. Fontijn PhD  
Department of Molecular Cell Biology and Immunology, room C272  
VU University Medical Center  
van der Boechorststraat 7  
1081 BT Amsterdam, The Netherlands  
Phone: 31-(0)20-4448155; Fax: 31-(0)20-4448081  
Mail: [r.fontijn@vumc.nl](mailto:r.fontijn@vumc.nl)

-----Original Message-----

From: Monica Giannotta [<mailto:monica.giannotta@ifom-ieo-campus.it>]  
Sent: donderdag 5 mei 2011 22:02  
To: Fontijn, R.D.  
Subject: claudin 5 construct

Dear Dr Fontijn,  
I would like to thank you for your constructs.  
I made the miniprep and everything works.  
Now, I would like to know the restriction sites that you used to insert  
human claudin5 in RRL-cPPT-CMV..... vector. Are they ECORI and PstI?

I would be grateful if you could answer.

I would like to have this information to make a control digestion.

Thank you again  
Monica

**From:** Daniel G. Tenen [csidgt@nus.edu.sg](mailto:csidgt@nus.edu.sg)  
**Subject:** Permission to use CEBPA constructs  
**Date:** 29 Apr 2020 05:28  
**To:** Monica Giannotta [monica.giannotta@ifom.eu](mailto:monica.giannotta@ifom.eu)

---

DG

Dear Dr. Giannotta,

As the corresponding author, I give you permission to use the CEBPA constructs I provided in your manuscript entitled "JAM-A acts via C/EBPA to promote claudin-5 expression and enhance endothelial barrier function " by Kakogiannos N. et al. (CIRCRES/2020/316742D)

Sincerely,

Daniel G. Tenen

---

Important: This email is confidential and may be privileged. If you are not the intended recipient, please delete it and notify us immediately; you should not copy or use it for any purpose, nor disclose its contents to any other person. Thank you.
