# Supplementary material for: JAM-A Acts via C/EBP-α to Promote Claudin-5 Expression and Enhance Endothelial Barrier Function
Source: PubMed Central journal article supplement — Circ Res. 2020 Jul 15;127(8):1056–73. doi: 10.1161/CIRCRESAHA.120.316742 (PMC7508279; doi:10.1161/circresaha.120.316742), 2020-07-15
Supplement: res-127-1056-s002.pdf [file res-127-1056-s002.pdf]

## Major Resources Table

### Animals (in vivo studies)

| Species               | Vendor or Source | Background Strain | Sex | Persistent ID / URL                                                                                                                                                         |
|-----------------------|------------------|-------------------|-----|-----------------------------------------------------------------------------------------------------------------------------------------------------------------------------|
| <i>JAM-A</i> -WT mice | Charles river    | C57BL/6J          | M/F | <a href="https://www.criver.com/products-services/find-model/jax-c57bl6j-mice?region=27">https://www.criver.com/products-services/find-model/jax-c57bl6j-mice?region=27</a> |

### Genetically Modified Animals

|                         | Species | Vendor or Source | Background Strain | Other Information                                                                                                    | Persistent ID / URL                                                                           |
|-------------------------|---------|------------------|-------------------|----------------------------------------------------------------------------------------------------------------------|-----------------------------------------------------------------------------------------------|
| <i>JAM-A</i> -null mice | mouse   |                  | C57BL/6J          | <i>JAM-A</i> -null mice were generated by crossing <i>JAM-A<sup>flox/flox</sup></i> mice with <i>CAG-Cre</i> animals | <a href="https://www.jci.org/articles/view/21231">https://www.jci.org/articles/view/21231</a> |

### Antibodies

| Target antigen                         | Vendor or Source          | Catalog #    | Isotype | Working concentration                               | Persistent ID / URL                                                                                                                                                                           |
|----------------------------------------|---------------------------|--------------|---------|-----------------------------------------------------|-----------------------------------------------------------------------------------------------------------------------------------------------------------------------------------------------|
| anti-CEBP- $\alpha$ rabbit monoclonal  | Cell Signaling Technology | 8178S        | IgG     | 1:500 for WB<br>1:200 for IF                        | <a href="https://www.cellsignal.com/products/primary-antibodies/c-ebpa-d56f10-xp-rabbit-mab/8178">https://www.cellsignal.com/products/primary-antibodies/c-ebpa-d56f10-xp-rabbit-mab/8178</a> |
| anti-C/EBP- $\alpha$ rabbit polyclonal | Abcam                     | ab140479     | IgG     | 1:100 for IF on paraffin sections                   | <a href="https://www.abcam.com/cebpa-alpha-cebpa-antibody-ab140479.html">https://www.abcam.com/cebpa-alpha-cebpa-antibody-ab140479.html</a>                                                   |
| anti-C/EBP- $\alpha$ rabbit polyclonal | Santa Cruz Biotechnology  | 14AA X:sc-61 | IgG     | 5 $\mu$ g for 200 $\mu$ g of total protein for CHIP | <a href="https://datasheets.scbt.com/sc-61.pdf">https://datasheets.scbt.com/sc-61.pdf</a>                                                                                                     |
| anti-C/EBP- $\beta$ rabbit polyclonal  | Cell Signaling Technology | 3082S        | IgG     | 1:500 for WB                                        | <a href="https://www.cellsignal.com/products/primary-antibodies/c-ebpbeta-antibody/3082">https://www.cellsignal.com/products/primary-antibodies/c-ebpbeta-antibody/3082</a>                   |
| anti-C/EBP- $\gamma$ rabbit polyclonal | Santa Cruz Biotechnology  | sc25769      | IgG     | 1:250 for WB                                        | <a href="https://www.scbt.com/it/p/c-ebp-gamma-antibody-h-50">https://www.scbt.com/it/p/c-ebp-gamma-antibody-h-50</a>                                                                         |
| anti-C/EBP- $\delta$ rabbit polyclonal | Santa Cruz Biotechnology  | sc-636       | IgG     | 1:250 for WB                                        | <a href="https://www.scbt.com/it/p/c-ebp-delta-antibody-m-17">https://www.scbt.com/it/p/c-ebp-delta-antibody-m-17</a>                                                                         |
| anti-ERG mouse monoclonal              | Abcam                     | ab136152     | IgG1    | 1:5 for IF on paraffin sections                     | <a href="https://www.citeab.com/antibodies/728564-ab136152-anti-erg-antibody-9fy">https://www.citeab.com/antibodies/728564-ab136152-anti-erg-antibody-9fy</a>                                 |
| anti-GAPDH mouse monoclonal            | Santa Cruz Biotechnology  | sc-32233     | IgG1    | 1:1000 for WB                                       | <a href="https://www.scbt.com/it/p/gapdh-antibody-6c5">https://www.scbt.com/it/p/gapdh-antibody-6c5</a>                                                                                       |
| anti-JAM-A rat                         | homemade                  |              | IgG1    | 1:600 for IF                                        | <a href="https://rupress.org/jcb/article/142/1/117/1037/Junctional-">https://rupress.org/jcb/article/142/1/117/1037/Junctional-</a>                                                           |

|                                                              |                                    |               |               |                                      |                                                                                                                                                                                                                                                                                                                                     |
|--------------------------------------------------------------|------------------------------------|---------------|---------------|--------------------------------------|-------------------------------------------------------------------------------------------------------------------------------------------------------------------------------------------------------------------------------------------------------------------------------------------------------------------------------------|
| polyclonal<br>BV12                                           |                                    |               |               |                                      | <a href="#">Adhesion-Molecule-a-Novel-Member-of-the</a>                                                                                                                                                                                                                                                                             |
| anti-JAM-A<br>goat<br>polyclonal                             | R&D Systems                        | AF1077        | IgG           | 1:2500 for WB                        | <a href="https://www.rndsystems.com/products/mouse-jam-a-antibody_af1077">https://www.rndsystems.com/products/mouse-jam-a-antibody_af1077</a>                                                                                                                                                                                       |
| anti-JAM-A<br>rabbit<br>monoclonal                           | Abcam                              | ab52647       | IgG           | 1:100 for IF on<br>paraffin sections | <a href="https://www.abcam.com/junctional-adhesion-molecule-1jam-a-antibody-ep1042y-ab52647.html">https://www.abcam.com/junctional-adhesion-molecule-1jam-a-antibody-ep1042y-ab52647.html</a>                                                                                                                                       |
| anti-claudin-<br>5 rabbit<br>polyclonal                      | Abcam                              | ab53765       | IgG           | 1:100 for IF on<br>paraffin sections | <a href="https://www.citeab.com/antibodies/723501-ab53765-anti-claudin-5-antibody">https://www.citeab.com/antibodies/723501-ab53765-anti-claudin-5-antibody</a>                                                                                                                                                                     |
| anti-claudin-<br>5 mouse<br>monoclonal<br>Alexa Fluor<br>488 | Thermo Fisher<br>Scientific        | 352588        | IgG1          | 1:200 for IF on<br>paraffin sections | <a href="https://www.thermofisher.com/antibody/product/Claudin-5-Antibody-clone-4C3C2-Monoclonal/352588">https://www.thermofisher.com/antibody/product/Claudin-5-Antibody-clone-4C3C2-Monoclonal/352588</a>                                                                                                                         |
| anti-claudin-<br>5 rabbit<br>polyclonal                      | Abcam                              | ab15106       | IgG           | 1:50 for IF on<br>paraffin sections  | <a href="https://www.abcam.com/claudin-5-antibody-ab15106.html">https://www.abcam.com/claudin-5-antibody-ab15106.html</a>                                                                                                                                                                                                           |
| anti-claudin-<br>5 mouse<br>monoclonal                       | Thermo Fisher<br>Scientific        | 352500        | IgG1          | 1:250 for WB                         | <a href="https://www.thermofisher.com/antibody/product/Claudin-5-Antibody-clone-4C3C2-Monoclonal/35-2500">https://www.thermofisher.com/antibody/product/Claudin-5-Antibody-clone-4C3C2-Monoclonal/35-2500</a>                                                                                                                       |
| anti-<br>PECAM-1<br>goat<br>polyclonal                       | R&D Systems                        | AF3628        | IgG           | 1:40 for IF on<br>paraffin sections  | <a href="https://www.rndsystems.com/products/mouse-rat-cd31-pecam-1-antibody_af3628">https://www.rndsystems.com/products/mouse-rat-cd31-pecam-1-antibody_af3628</a>                                                                                                                                                                 |
| anti-<br>PECAM-1<br>hamster<br>monoclonal                    | Merck<br>Millipore                 | MAB1398<br>Z  | IgG           | 1:400 for IF                         | <a href="https://www.citeab.com/antibodies/226141-mab1398z-anti-pecam-1-antibody-clone-2h8-azide-free">https://www.citeab.com/antibodies/226141-mab1398z-anti-pecam-1-antibody-clone-2h8-azide-free</a>                                                                                                                             |
| anti-lamin B<br>goat<br>polyclonal                           | Santa Cruz<br>Biotechnology        | sc-6217       | IgG           | 1:2000 for WB                        | <a href="https://www.scbt.com/it/p/lamin-b-antibody-m-20">https://www.scbt.com/it/p/lamin-b-antibody-m-20</a>                                                                                                                                                                                                                       |
| anti-cingulin<br>rabbit<br>polyclonal                        | Thermo Fisher<br>Scientific        | PA5-<br>55673 | IgG           | 1:250 for WB                         | <a href="https://www.thermofisher.com/antibody/product/CGN-Antibody-Polyclonal/PA5-55673">https://www.thermofisher.com/antibody/product/CGN-Antibody-Polyclonal/PA5-55673</a>                                                                                                                                                       |
| anti-occludin<br>mouse<br>monoclonal<br>(OC-3F10)            | Thermo Fisher<br>Scientific        | 33-1500       | IgG1k         | 1:500 for WB                         | <a href="https://www.thermofisher.com/antibody/product/Occludin-Antibody-clone-OC-3F10-Monoclonal/33-1500">https://www.thermofisher.com/antibody/product/Occludin-Antibody-clone-OC-3F10-Monoclonal/33-1500</a>                                                                                                                     |
| anti-afadin<br>mouse<br>monoclonal                           | BD<br>Transduction<br>Laboratories | 610732        | IgG2 $\alpha$ | 1:500 for WB                         | <a href="https://www.bdbiosciences.com/eu/reagents/research/antibodies-buffers/cell-biology-reagents/cell-biology-antibodies/purified-mouse-anti-af6-35af6/p/610732">https://www.bdbiosciences.com/eu/reagents/research/antibodies-buffers/cell-biology-reagents/cell-biology-antibodies/purified-mouse-anti-af6-35af6/p/610732</a> |
| Anti-zo-1<br>rabbit<br>polyclonal                            | Abcam                              | ab216880      | IgG           | 1:1000 for WB                        | <a href="https://www.abcam.com/zo1-tight-junction-protein-antibody-ab216880.html">https://www.abcam.com/zo1-tight-junction-protein-antibody-ab216880.html</a>                                                                                                                                                                       |

|                                            |                           |          |        |                                                |                                                                                                                                                                                                                                                                                                                       |
|--------------------------------------------|---------------------------|----------|--------|------------------------------------------------|-----------------------------------------------------------------------------------------------------------------------------------------------------------------------------------------------------------------------------------------------------------------------------------------------------------------------|
| anti-tubulin mouse monoclonal              | Sigma-Aldrich             | T9026    | IgG1   | 1:2000 for WB and IF                           | <a href="https://www.sigmaaldrich.com/catalog/product/sigma/t9026?lang=it&amp;region=IT">https://www.sigmaaldrich.com/catalog/product/sigma/t9026?lang=it&amp;region=IT</a>                                                                                                                                           |
| anti-CREB rabbit polyclonal                | Cell Signaling Technology | D76D11   | IgG    | 1:1000 for WB                                  | <a href="https://www.cellsignal.com/products/primary-antibodies/creb-d76d11-rabbit-mab/4820">https://www.cellsignal.com/products/primary-antibodies/creb-d76d11-rabbit-mab/4820</a>                                                                                                                                   |
| anti-phospho-CREB Ser133 rabbit monoclonal | Cell Signaling Technology | 87G3     | IgG    | 1:500 for WB                                   | <a href="https://www.cellsignal.com/products/primary-antibodies/phospho-creb-ser133-87g3-rabbit-mab/9198">https://www.cellsignal.com/products/primary-antibodies/phospho-creb-ser133-87g3-rabbit-mab/9198</a>                                                                                                         |
| anti-β-catenin                             | BD Biosciences            | BD610154 | IgG1   | 1:2000 for WB                                  | <a href="https://wwwbdbiosciences.com/us/applications/research/stem-cell-research/cancer-research/human/purified-mouse-anti--catenin-14beta-catenin/p/610154">https://wwwbdbiosciences.com/us/applications/research/stem-cell-research/cancer-research/human/purified-mouse-anti--catenin-14beta-catenin/p/610154</a> |
| anti-phospho-β-catenin Ser552              | BioLabs                   | 5651     | IgG    | 1:1000 for WB                                  | <a href="https://www.cellsignal.com/products/primary-antibodies/phospho-b-catenin-ser552-d8e11-rabbit-mab/5651">https://www.cellsignal.com/products/primary-antibodies/phospho-b-catenin-ser552-d8e11-rabbit-mab/5651</a>                                                                                             |
| anti-VE-cadherin goat                      | Santa Cruz Biotechnology  | sc-6458  | IgG    | 1:500 for WB; 1:50 for IF on paraffin sections | <a href="https://www.citeab.com/antibodies/807309-sc-6458-ve-cadherin-antibody-c-19">https://www.citeab.com/antibodies/807309-sc-6458-ve-cadherin-antibody-c-19</a>                                                                                                                                                   |
| anti-podocalyxin                           | R&D Systems               | AF1556   | IgG    | 1:400 for IF                                   | <a href="https://www.rndsystems.com/products/mouse-podocalyxin-antibody_af1556">https://www.rndsystems.com/products/mouse-podocalyxin-antibody_af1556</a>                                                                                                                                                             |
| anti-GFP                                   | Santa Cruz Biotechnology  | sc-9996  | IgG2ak | 1:8000 for WB                                  | <a href="https://www.scbt.com/p/gfp-antibody-b-2?gclid=EAIaIQobChMizlyV04Gh6AIVCLrtCh0gUAFEEAAYASAAEgLGWvD_BwE">https://www.scbt.com/p/gfp-antibody-b-2?gclid=EAIaIQobChMizlyV04Gh6AIVCLrtCh0gUAFEEAAYASAAEgLGWvD_BwE</a>                                                                                             |
| anti-4',6-diamidino-2-phenylindole (DAPI)  | Sigma-Aldrich             | D9542    |        | 1:5000 for IF                                  | <a href="https://www.sigmaaldrich.com/catalog/product/sigma/d9542?lang=it&amp;region=IT">https://www.sigmaaldrich.com/catalog/product/sigma/d9542?lang=it&amp;region=IT</a>                                                                                                                                           |
| Phalloidin-TRITC                           | Sigma-Aldrich             | P1951    |        | 1:200 for IF                                   | <a href="https://www.sigmaaldrich.com/catalog/search?term=P1951&amp;interface=All&amp;N=0&amp;mode=partial_max&amp;lang=it&amp;region=IT&amp;focus=product">https://www.sigmaaldrich.com/catalog/search?term=P1951&amp;interface=All&amp;N=0&amp;mode=partial_max&amp;lang=it&amp;region=IT&amp;focus=product</a>     |
| anti-vinculin mouse monoclonal             | Sigma-Aldrich             | 9131     | IgG1   | 1:5000 for WB                                  | <a href="https://www.sigmaaldrich.com/catalog/product/sigma/v9131?lang=it&amp;region=IT&amp;gclid=EAIaIQobChMihMKP84Gh6AIViazChOrGwdeEAAYASAAEgJBEPD_BwE">https://www.sigmaaldrich.com/catalog/product/sigma/v9131?lang=it&amp;region=IT&amp;gclid=EAIaIQobChMihMKP84Gh6AIViazChOrGwdeEAAYASAAEgJBEPD_BwE</a>         |
| streptavidin-Alexa Fluor 555               | Thermo Fischer Scientific | S32355   |        | 1:400 for IF                                   | <a href="https://www.thermofisher.com/order/catalog/product/S32355?SID=srch-hj-">https://www.thermofisher.com/order/catalog/product/S32355?SID=srch-hj-</a>                                                                                                                                                           |

|                                                          |                           |                                                                                                                                                                                  |     |               |                                                                                                                                                                                                                                                                                                               |
|----------------------------------------------------------|---------------------------|----------------------------------------------------------------------------------------------------------------------------------------------------------------------------------|-----|---------------|---------------------------------------------------------------------------------------------------------------------------------------------------------------------------------------------------------------------------------------------------------------------------------------------------------------|
|                                                          |                           |                                                                                                                                                                                  |     |               | <a href="https://www.cellsignal.com/products/secondary-antibodies/anti-mouse-igg-hrp-linked-antibody/7076">S32355#/S32355?SID=srch-hj-S32355</a>                                                                                                                                                              |
| anti-mouse IgG, HRP-linked Antibody                      | Cell Signaling Technology | 7076                                                                                                                                                                             | IgG | 1:2000 for WB | <a href="https://www.cellsignal.com/products/secondary-antibodies/anti-mouse-igg-hrp-linked-antibody/7076">https://www.cellsignal.com/products/secondary-antibodies/anti-mouse-igg-hrp-linked-antibody/7076</a>                                                                                               |
| anti-rabbit IgG, HRP-linked Antibody                     | Cell Signaling Technology | 7074                                                                                                                                                                             | IgG | 1:2000 for WB | <a href="https://www.cellsignal.com/products/secondary-antibodies/anti-rabbit-igg-hrp-linked-antibody/7074">https://www.cellsignal.com/products/secondary-antibodies/anti-rabbit-igg-hrp-linked-antibody/7074</a>                                                                                             |
| anti-rat IgG, HRP-linked Antibody                        | Cell Signaling Technology | 7077                                                                                                                                                                             | IgG | 1:2000 for WB | <a href="https://www.cellsignal.com/products/secondary-antibodies/anti-rat-igg-hrp-linked-antibody/7077">https://www.cellsignal.com/products/secondary-antibodies/anti-rat-igg-hrp-linked-antibody/7077</a>                                                                                                   |
| anti-goat IgG HRP-conjugated Antibody                    | R&D Systems               | HAF017                                                                                                                                                                           | IgG | 1:1000 for WB | <a href="https://www.rndsystems.com/search?keywords=anti-goat+HRP+conjugated">https://www.rndsystems.com/search?keywords=anti-goat+HRP+conjugated</a>                                                                                                                                                         |
| Alexa Fluor 488, 555 and 647 donkey secondary antibodies | Jackson ImmunoResearch    | 705-545-147<br>705-165-147<br>705-605-147<br>715-545-151<br>715-165-151<br>715-605-151<br>711-545-152<br>711-165-152<br>711-605-152<br>127-545-160<br>127-165-160<br>127-605-160 |     | 1:400 for IF  | <a href="https://www.jacksonimmuno.com/">https://www.jacksonimmuno.com/</a>                                                                                                                                                                                                                                   |
| IgG rabbit control isotype                               | BD Biosciences            | 550875                                                                                                                                                                           | IgG | 1:100 for IF  | <a href="https://wwwbdbiosciences.com/eu/applications/research/b-cell-research/immunoassays/elisa/pairs-and-standards/other-species/purified-rabbit-igg-">https://wwwbdbiosciences.com/eu/applications/research/b-cell-research/immunoassays/elisa/pairs-and-standards/other-species/purified-rabbit-igg-</a> |

|                                             |                |        |                    |              |                                                                                                                                                                                                                                                                                                                                                                                                                             |
|---------------------------------------------|----------------|--------|--------------------|--------------|-----------------------------------------------------------------------------------------------------------------------------------------------------------------------------------------------------------------------------------------------------------------------------------------------------------------------------------------------------------------------------------------------------------------------------|
|                                             |                |        |                    |              | <a href="https://www.bdbiosciences.com/eu/reagents/research/antibodies-buffers/immunology-reagents/anti-non-human-primate-antibodies/cell-surface-antigens/purified-mouse-igg1-isotype-control-mopc-21/p/556648">isotype-standard-polyclonal/p/550875</a>                                                                                                                                                                   |
| IgG1k mouse control isotype [MOPC-21]       | BD Biosciences | 556648 | IgG1               | 1:100 for IF | <a href="https://www.bdbiosciences.com/eu/reagents/research/antibodies-buffers/immunology-reagents/anti-non-human-primate-antibodies/cell-surface-antigens/purified-mouse-igg1-isotype-control-mopc-21/p/556648">https://www.bdbiosciences.com/eu/reagents/research/antibodies-buffers/immunology-reagents/anti-non-human-primate-antibodies/cell-surface-antigens/purified-mouse-igg1-isotype-control-mopc-21/p/556648</a> |
| Purified Rat IgG1, $\kappa$ Isotype Control | BD Biosciences | 555839 | Rat IgG1, $\kappa$ | 1:100 for IF | <a href="https://www.bdbiosciences.com/eu/reagents/research/antibodies-buffers/immunology-reagents/anti-human-antibodies/cell-surface-antigens/purified-rat-igg1-isotype-control-r3-34/p/555839">https://www.bdbiosciences.com/eu/reagents/research/antibodies-buffers/immunology-reagents/anti-human-antibodies/cell-surface-antigens/purified-rat-igg1-isotype-control-r3-34/p/555839</a>                                 |

### DNA/cDNA Clones

| Clone Name                                     | Sequence                                     | Source / Repository                                                              | Persistent ID / URL                                                                                                                             |
|------------------------------------------------|----------------------------------------------|----------------------------------------------------------------------------------|-------------------------------------------------------------------------------------------------------------------------------------------------|
| eGFP                                           | Retroviral vector FMEV-GFP (R780)            |                                                                                  | <a href="https://doi.org/10.1182/blood-2003-07-2280">https://doi.org/10.1182/blood-2003-07-2280</a>                                             |
| C/EBP- $\alpha$ -WT                            | Retroviral vector FMEV-C/EBP $\alpha$ (R890) | <a href="https://www.ncbi.nlm.nih.gov/nuccore/NM_001287424.2">NM_001287424.2</a> | <a href="https://doi.org/10.1182/blood-2003-07-2280">https://doi.org/10.1182/blood-2003-07-2280</a>                                             |
| C/EBP- $\alpha$ -DN                            | Retroviral vector FMEV-mut10 (R891)          |                                                                                  | <a href="https://doi.org/10.1182/blood-2003-07-2280">https://doi.org/10.1182/blood-2003-07-2280</a>                                             |
| pcDNA3 vector (empty vector)                   |                                              | V79020 (Thermo Fisher Scientific)                                                | <a href="https://www.thermofisher.com/order/catalog/product/V79020-V79020">https://www.thermofisher.com/order/catalog/product/V79020-V79020</a> |
| C/EBP- $\alpha$ -WT in pcDNA3                  | C/EBP $\alpha$ (R890)                        | <a href="https://www.ncbi.nlm.nih.gov/nuccore/NM_001287424.2">NM_001287424.2</a> |                                                                                                                                                 |
| C/EBP- $\alpha$ -DN in pcDNA3                  | mut10 (R891)                                 |                                                                                  |                                                                                                                                                 |
| Claudin-5-GFP in pRRL-CMV-X2-PRE-SIN-IRES-eGFP | Lentiviral vector                            | <a href="https://www.ncbi.nlm.nih.gov/nuccore/NM_001130861.1">NM_001130861.1</a> | <a href="https://doi.org/10.1016/j.jcb.2006.07.005">https://doi.org/10.1016/j.jcb.2006.07.005</a>                                               |
| pRRL-CMV-X2-PRE-SIN-IRES-eGFP (Empty vector)   | Lentiviral vector                            |                                                                                  | <a href="https://doi.org/10.1016/j.jcb.2006.07.005">https://doi.org/10.1016/j.jcb.2006.07.005</a>                                               |
| eGFP                                           | Adenoviral vector                            | 1060 (Vector Biolabs)                                                            | <a href="https://www.vectorbiolabs.com/product/1060-egfp-adenovirus/">https://www.vectorbiolabs.com/product/1060-egfp-adenovirus/</a>           |
| TCF4-DN                                        | Adenoviral vector                            | Donated by Sarah J. George (Bristol Heart Institute)                             | <a href="https://doi.org/10.1161/01.RES.0000253533.65446.33">https://doi.org/10.1161/01.RES.0000253533.65446.33</a>                             |
| TOP-FLASH                                      |                                              | Donated by Maria Pia Cosma (CRG, Barcelona)                                      | <a href="https://doi.org/10.1016/j.stem.2008.08.017">https://doi.org/10.1016/j.stem.2008.08.017</a>                                             |
| FOP-FLASH                                      |                                              | Donated by Maria Pia Cosma (CRG, Barcelona)                                      | <a href="https://doi.org/10.1016/j.stem.2008.08.017">https://doi.org/10.1016/j.stem.2008.08.017</a>                                             |
| pCMV- $\beta$ -Gal                             |                                              | GenBank Accession No. U02451, 631719 Clontech                                    |                                                                                                                                                 |

|                                                             |                        |                                  |                                                                                                                                                                                             |
|-------------------------------------------------------------|------------------------|----------------------------------|---------------------------------------------------------------------------------------------------------------------------------------------------------------------------------------------|
| pGL3-Basic Vector                                           |                        | GenBank® Accession Number U47295 |                                                                                                                                                                                             |
| siRNA: C/EBP- $\alpha$ s63854                               | AAAGCUGAGUUGU GAGUUAtt | Thermo Fisher Scientific         | <a href="https://www.thermofisher.com/order/genome-database/browse/sirna/keyword/s63854#filters">https://www.thermofisher.com/order/genome-database/browse/sirna/keyword/s63854#filters</a> |
| siRNA: C/EBP- $\alpha$ s63855                               | ACUCAAAACUCGCU CCUUUtt | Thermo Fisher Scientific         | <a href="https://www.thermofisher.com/order/genome-database/browse/sirna/keyword/s63855#filters">https://www.thermofisher.com/order/genome-database/browse/sirna/keyword/s63855#filters</a> |
| ON-TARGET plus set of four Upgrade siRNAs J-054103-09, F11r | UAUUCUAGCUAGC GUAUAA   | Thermo Fisher Scientific         |                                                                                                                                                                                             |
| ON-TARGET plus set of four Upgrade siRNAs J-054103-10, F11r | CAUCAGAGCUGUUC CGUAG   | Thermo Fisher Scientific         |                                                                                                                                                                                             |
| ON-TARGET plus set of four Upgrade siRNAs J-054103-11, F11r | CCAUCCAAGCCGAC GAUCA   | Thermo Fisher Scientific         |                                                                                                                                                                                             |
| ON-TARGET plus set of four Upgrade siRNAs J-054103-12, F11r | TCAGCATTGTGTAA CCCCAGT | Thermo Fisher Scientific         |                                                                                                                                                                                             |
| <i>f11r</i>                                                 | Taqman                 | Thermo Fisher                    | Mm00554113_m1                                                                                                                                                                               |
| <i>F11R</i>                                                 | Taqman                 | Thermo Fisher                    | Hs00170991_m1                                                                                                                                                                               |
| <i>cldn 5</i>                                               | Taqman                 | Thermo Fisher                    | Mm00727012_s1                                                                                                                                                                               |
| <i>cebpa</i>                                                | Taqman                 | Thermo Fisher                    | Mm00514283_s1                                                                                                                                                                               |
| <i>id2</i>                                                  | Taqman                 | Thermo Fisher                    | Mm00711781_m1                                                                                                                                                                               |
| <i>pparg</i>                                                | Taqman                 | Thermo Fisher                    | Mm00440945_m1                                                                                                                                                                               |
| <i>cdh5</i>                                                 | Taqman                 | Thermo Fisher                    | Mm00486938_m1                                                                                                                                                                               |
| <i>gapdh</i>                                                | Taqman                 | Thermo Fisher                    | Mm99999915_g1                                                                                                                                                                               |
| <i>18S</i>                                                  | Taqman                 | Thermo Fisher                    | Hs99999905_m1                                                                                                                                                                               |
| <i>hppt</i>                                                 | Taqman                 | Thermo Fisher                    | Mm00446968_m1                                                                                                                                                                               |
| <i>CLDN5</i>                                                | Taqman                 | Thermo Fisher                    | Hs00533949_s1                                                                                                                                                                               |
| <i>CEBPA</i>                                                | Taqman                 | Thermo Fisher                    | Hs00269972_s1                                                                                                                                                                               |
| <i>PECAM1</i>                                               | Taqman                 | Thermo Fisher                    | Hs01065279_m1                                                                                                                                                                               |
| <i>cebpb</i>                                                | Taqman                 | Thermo Fisher                    | Mm00843434_s1                                                                                                                                                                               |
| <i>cebpq</i>                                                | Taqman                 | Thermo Fisher                    | Mm01266786_m1                                                                                                                                                                               |
| <i>cebpd</i>                                                | Taqman                 | Thermo Fisher                    | Mm00514291_s1                                                                                                                                                                               |
| <i>csf1r</i>                                                | Taqman                 | Thermo Fisher                    | Mm01266652_m1                                                                                                                                                                               |
| <i>csf3r</i>                                                | Taqman                 | Thermo Fisher                    | Mm00432735_m1                                                                                                                                                                               |
| <i>pecam1</i>                                               | Taqman                 | Thermo Fisher                    | Mm00476702_m1                                                                                                                                                                               |
| <i>cdh1</i>                                                 | Taqman                 | Thermo Fisher                    | Mm00486906_m1                                                                                                                                                                               |
| <i>acta2</i>                                                | Taqman                 | Thermo Fisher                    | Mm01546133_m1                                                                                                                                                                               |
| <i>cspg4</i>                                                | Taqman                 | Thermo Fisher                    | Mm00507257_m1                                                                                                                                                                               |
| <i>s100a4</i>                                               | Taqman                 | Thermo Fisher                    | Mm00803371_m1                                                                                                                                                                               |
| <i>aqp4</i>                                                 | Taqman                 | Thermo Fisher                    | Mm00802131_m1                                                                                                                                                                               |
| <i>axin2</i>                                                | Taqman                 | Thermo Fisher                    | Mm00443610_m1                                                                                                                                                                               |
| <i>ccnd1</i>                                                | Taqman                 | Thermo Fisher                    | Mm00432359_m1                                                                                                                                                                               |
| <i>ocln</i>                                                 | Taqman                 | Thermo Fisher                    | Mm00500912_m1                                                                                                                                                                               |
| <i>cgn</i>                                                  | Taqman                 | Thermo Fisher                    | Mm01263533_m1                                                                                                                                                                               |

|             |        |               |               |
|-------------|--------|---------------|---------------|
| <i>tjp1</i> | Tagman | Thermo Fisher | Mm00493699_m1 |
| GAPDH       | Tagman | Thermo Fisher | Hs99999905_m1 |

### Cultured Cells

| Name                                             | Vendor or Source                                                  | Sex (F, M, or unknown) | Persistent ID / URL                                                                                                                                                     |
|--------------------------------------------------|-------------------------------------------------------------------|------------------------|-------------------------------------------------------------------------------------------------------------------------------------------------------------------------|
| Immortalised lung endothelial cells (iLECs)      | from lungs of adult <i>JAM-A</i> -WT and <i>JAM-A</i> -null mice  | M/F                    | <a href="https://www.jci.org/articles/view/21231">https://www.jci.org/articles/view/21231</a>                                                                           |
| Freshly isolated lung endothelial cells (fLECs)  | from lungs of adult <i>JAM-A</i> -WT and <i>JAM-A</i> -null mice  | M/F                    |                                                                                                                                                                         |
| Freshly isolated brain endothelial cells (fBECs) | from brains of adult <i>JAM-A</i> -WT and <i>JAM-A</i> -null mice | M/F                    |                                                                                                                                                                         |
| HEK 293T cells                                   | Interlab cell line collection                                     | unknown                |                                                                                                                                                                         |
| Phoenix-AMPHO                                    | ATCC <sup>®</sup> CRL-3213 <sup>™</sup>                           | unknown                | <a href="https://www.lgcstandards-atcc.org/products/all/CRL-3213.aspx?geo_country=it#">https://www.lgcstandards-atcc.org/products/all/CRL-3213.aspx?geo_country=it#</a> |
| Phoenix-ECO                                      | ATCC <sup>®</sup> CRL-3214 <sup>™</sup>                           | unknown                | <a href="https://www.lgcstandards-atcc.org/products/all/CRL-3214.aspx?geo_country=it">https://www.lgcstandards-atcc.org/products/all/CRL-3214.aspx?geo_country=it</a>   |

### Data & Code Availability

| Description | Source / Repository |  |
|-------------|---------------------|--|
|             |                     |  |
|             |                     |  |
|             |                     |  |
|             |                     |  |
|             |                     |  |
|             |                     |  |
|             |                     |  |

### Other

| Description                                                        | Source / Repository                 | Persistent ID / URL                                                                                                                                                                                                               |
|--------------------------------------------------------------------|-------------------------------------|-----------------------------------------------------------------------------------------------------------------------------------------------------------------------------------------------------------------------------------|
| Avertin                                                            | T48402, Sigma-Aldrich               | <a href="https://www.sigmaaldrich.com/catalog/product/aldrich/t48402?lang=it&amp;region=IT">https://www.sigmaaldrich.com/catalog/product/aldrich/t48402?lang=it&amp;region=IT</a>                                                 |
| EZ-link-sulfo-NHS-biotin                                           | 21217, Thermo Fisher Scientific     | <a href="https://www.thermofisher.com/order/catalog/product/21217#/21217">https://www.thermofisher.com/order/catalog/product/21217#/21217</a>                                                                                     |
| DPBS, calcium, magnesium                                           | 14040-091, Thermo Fisher Scientific | <a href="https://www.thermofisher.com/order/catalog/product/14040091#/14040091">https://www.thermofisher.com/order/catalog/product/14040091#/14040091</a>                                                                         |
| Alexa Fluor <sup>™</sup> 555 Cadaverine                            | A30677, Thermo Fisher Scientific    | <a href="https://www.thermofisher.com/order/catalog/product/A30677?SID=srch-srp-A30677#/A30677?SID=srch-srp-A30677">https://www.thermofisher.com/order/catalog/product/A30677?SID=srch-srp-A30677#/A30677?SID=srch-srp-A30677</a> |
| Dextran, Alexa Fluor <sup>™</sup> 488; 10,000 MW, Anionic, Fixable | D22910, Thermo Fisher Scientific    | <a href="https://www.thermofisher.com/order/catalog/product/D22910?SID=srch-">https://www.thermofisher.com/order/catalog/product/D22910?SID=srch-</a>                                                                             |

DOI [to be added]

|                                                                                                      |                                     |                                                                                                                                                                                                                                                                                                                                                                           |
|------------------------------------------------------------------------------------------------------|-------------------------------------|---------------------------------------------------------------------------------------------------------------------------------------------------------------------------------------------------------------------------------------------------------------------------------------------------------------------------------------------------------------------------|
|                                                                                                      |                                     | <a href="https://www.thermofisher.com/order/catalog/product/14025050#/14025050">srp-D22910#/D22910?SID=srch-srp-D22910</a>                                                                                                                                                                                                                                                |
| HBSS, calcium, magnesium, no phenol red                                                              | 14025-050, Thermo Fisher Scientific | <a href="https://www.thermofisher.com/order/catalog/product/14025050#/14025050">https://www.thermofisher.com/order/catalog/product/14025050#/14025050</a>                                                                                                                                                                                                                 |
| Vectashield                                                                                          | H-1200, Vector                      | <a href="https://vectorlabs.com/vectashield-mounting-medium-with-dapi.html">https://vectorlabs.com/vectashield-mounting-medium-with-dapi.html</a>                                                                                                                                                                                                                         |
| Collagenase type A                                                                                   | 11088793001, Roche                  | <a href="https://www.sigmaaldrich.com/catalog/search?term=11088793001&amp;interface=All_JA&amp;N=0&amp;mode=match%20partialmax&amp;lang=it&amp;region=IT&amp;focus=product">https://www.sigmaaldrich.com/catalog/search?term=11088793001&amp;interface=All_JA&amp;N=0&amp;mode=match%20partialmax&amp;lang=it&amp;region=IT&amp;focus=product</a>                         |
| Red blood cell lysis buffer                                                                          | R7757, Sigma-Aldrich                | <a href="https://www.sigmaaldrich.com/catalog/product/sigma/r7757?lang=it&amp;region=IT">https://www.sigmaaldrich.com/catalog/product/sigma/r7757?lang=it&amp;region=IT</a>                                                                                                                                                                                               |
| anti-CD31-coated magnetic beads (Dynabeads;)                                                         | 11035, Invitrogen                   | <a href="https://www.thermofisher.com/order/catalog/product/11035#/11035">https://www.thermofisher.com/order/catalog/product/11035#/11035</a>                                                                                                                                                                                                                             |
| DMEM, high glucose, GlutaMAX™ Supplement, HEPES                                                      | 10564011, Thermo Fisher Scientific  | <a href="https://www.thermofisher.com/order/catalog/product/10564011?SID=srch-hj-10564011#/10564011?SID=srch-hj-10564011">https://www.thermofisher.com/order/catalog/product/10564011?SID=srch-hj-10564011#/10564011?SID=srch-hj-10564011</a>                                                                                                                             |
| Penicillin/ streptomycin                                                                             | ECB3001D, Euroclone                 | <a href="https://www.euroclonegroup.it/documents/documents/ECB3001_3380_.pdf">https://www.euroclonegroup.it/documents/documents/ECB3001_3380_.pdf</a>                                                                                                                                                                                                                     |
| Puromycin                                                                                            | AG-CN2-0078, Adipogen               | <a href="https://www.vincibiochem.it/prodotti/nhTPQ1Cdy%5E%5E%5ELjaaWo7TU2ew==/d8P8fr1qPhE=">https://www.vincibiochem.it/prodotti/nhTPQ1Cdy%5E%5E%5ELjaaWo7TU2ew==/d8P8fr1qPhE=</a>                                                                                                                                                                                       |
| MCDB 131 Medium, no glutamine                                                                        | 10372-019, Thermo Fisher Scientific | <a href="https://www.thermofisher.com/order/catalog/product/10372019#/10372019">https://www.thermofisher.com/order/catalog/product/10372019#/10372019</a>                                                                                                                                                                                                                 |
| 8-pCTP-cAMP                                                                                          | C3912, Sigma-Aldrich                | <a href="https://www.sigmaaldrich.com/catalog/product/sigma/c3912?lang=it&amp;region=IT">https://www.sigmaaldrich.com/catalog/product/sigma/c3912?lang=it&amp;region=IT</a>                                                                                                                                                                                               |
| 8-pCPT-2'-O-Me-cAMP (007 )                                                                           | C041, Biolog                        | <a href="https://www.biolog.de/8-pcpt-2-o-me-camp">https://www.biolog.de/8-pcpt-2-o-me-camp</a>                                                                                                                                                                                                                                                                           |
| (3-[5- (tert.-Butyl)isoxazol- 3- yl]-2- [2- (3-chlorophenyl)hydrazono]- 3-oxopropanenitrile (ESI-09) | B133, Biolog                        | <a href="https://www.biolog.de/esi-09">https://www.biolog.de/esi-09</a>                                                                                                                                                                                                                                                                                                   |
| Lung Dissociation kits;                                                                              | 130-095-927, Miltenyi Biotech       | <a href="https://www.miltenyibiotec.com/ES-en/products/mac-s-sample-preparation/tissue-dissociation-kits/lung-dissociation-kit-mouse.html#gref">https://www.miltenyibiotec.com/ES-en/products/mac-s-sample-preparation/tissue-dissociation-kits/lung-dissociation-kit-mouse.html#gref</a>                                                                                 |
| CD45 MicroBeads                                                                                      | 30-052-301, Miltenyi Biotech        | <a href="https://www.miltenyibiotec.com/IT-en/products/mac-s-cell-separation/cell-separation-reagents/microbeads-and-isolation-kits/various-cell-types/cd45-microbeads-mouse.html#gref">https://www.miltenyibiotec.com/IT-en/products/mac-s-cell-separation/cell-separation-reagents/microbeads-and-isolation-kits/various-cell-types/cd45-microbeads-mouse.html#gref</a> |
| CD31 MicroBeads                                                                                      | 30-097-418, Miltenyi Biotech        | <a href="https://www.miltenyibiotec.com/FL-en/products/mac-s-cell-separation/cell-">https://www.miltenyibiotec.com/FL-en/products/mac-s-cell-separation/cell-</a>                                                                                                                                                                                                         |

DOI [to be added]



|                                                                           |                               |                                                                                                                                                                                                                                                                                                                                                                                         |
|---------------------------------------------------------------------------|-------------------------------|-----------------------------------------------------------------------------------------------------------------------------------------------------------------------------------------------------------------------------------------------------------------------------------------------------------------------------------------------------------------------------------------|
|                                                                           |                               | <a href="https://www.miltenyibiotec.com/IT-en/products/macs-sample-preparation/tissue-dissociation-kits/adult-brain-dissociation-kit-mouse-and-rat.html#gref">separation-reagents/microbeads-and-isolation-kits/endothelial-cells/cd31-microbeads-mouse.html#gref</a>                                                                                                                   |
| Adult Brain Dissociation kits                                             | 130-107-677, Miltenyi Biotech | <a href="https://www.miltenyibiotec.com/IT-en/products/macs-sample-preparation/tissue-dissociation-kits/adult-brain-dissociation-kit-mouse-and-rat.html#gref">https://www.miltenyibiotec.com/IT-en/products/macs-sample-preparation/tissue-dissociation-kits/adult-brain-dissociation-kit-mouse-and-rat.html#gref</a>                                                                   |
| AN2 Microbeads                                                            | 130-097-171, Miltenyi Biotech | <a href="https://www.miltenyibiotec.com/IT-en/products/macs-cell-separation/cell-separation-reagents/microbeads-and-isolation-kits/neural-cells/anti-an2-microbeads-human-and-mouse.html#gref">https://www.miltenyibiotec.com/IT-en/products/macs-cell-separation/cell-separation-reagents/microbeads-and-isolation-kits/neural-cells/anti-an2-microbeads-human-and-mouse.html#gref</a> |
| ACSA-2 Microbeads                                                         | 130-097-678, Miltenyi Biotech | <a href="https://www.miltenyibiotec.com/LI-en/products/macs-cell-separation/cell-separation-reagents/microbeads-and-isolation-kits/neural-cells/anti-acsa-2-microbead-kit-mouse.html#gref">https://www.miltenyibiotec.com/LI-en/products/macs-cell-separation/cell-separation-reagents/microbeads-and-isolation-kits/neural-cells/anti-acsa-2-microbead-kit-mouse.html#gref</a>         |
| Collagen I                                                                | 354236, BD Biosciences        | <a href="https://www.selectscience.net/product/s/bd-collagen-i,-rat-tail,-100-mg/?prodID=108044">https://www.selectscience.net/product/s/bd-collagen-i,-rat-tail,-100-mg/?prodID=108044</a>                                                                                                                                                                                             |
| Foetal bovine serum                                                       | CHA2151L, Hyclone             | <a href="https://www.gelifesciences.com/en/do/shop/cell-culture-and-fermentation/sera?gclid=EA1aIQobChMIrc3Rqp6h6AIVhuR3Ch1XlwHLEAAYAyAAEgJgqfD_BwE">https://www.gelifesciences.com/en/do/shop/cell-culture-and-fermentation/sera?gclid=EA1aIQobChMIrc3Rqp6h6AIVhuR3Ch1XlwHLEAAYAyAAEgJgqfD_BwE</a>                                                                                     |
| Heparin                                                                   | H3149, Sigma-Aldrich          | <a href="https://www.sigmaaldrich.com/catalog/search?term=H3149-25KU&amp;interface=All&amp;N=0&amp;mode=partialmax&amp;lang=it&amp;region=IT&amp;focus=product">https://www.sigmaaldrich.com/catalog/search?term=H3149-25KU&amp;interface=All&amp;N=0&amp;mode=partialmax&amp;lang=it&amp;region=IT&amp;focus=product</a>                                                               |
| Endothelial Cell Growth Supplement                                        | E2759, Sigma-Aldrich          | <a href="https://www.sigmaaldrich.com/content/dam/sigma-aldrich/docs/Sigma/Datasheet/3/e2759dat.pdf">https://www.sigmaaldrich.com/content/dam/sigma-aldrich/docs/Sigma/Datasheet/3/e2759dat.pdf</a>                                                                                                                                                                                     |
| Lipofectamine 2000 (LS11668019)                                           | Invitrogen                    | <a href="https://www.fishersci.ca/shop/products/invitrogen-lipofectamine-2000-transfection-reagent-2/p-4255290">https://www.fishersci.ca/shop/products/invitrogen-lipofectamine-2000-transfection-reagent-2/p-4255290</a>                                                                                                                                                               |
| 6.5 mm Transwell® with 0.4 µm Pore Polycarbonate Membrane Insert, Sterile | 3413, Corning                 | <a href="https://ecatalog.corning.com/life-sciences/b2b/US/en/Permeable-Supports/Inserts/Transwell%C2%AE-Permeable-Supports,-Polycarbonate-(PC)-Membrane/p/3413">https://ecatalog.corning.com/life-sciences/b2b/US/en/Permeable-Supports/Inserts/Transwell%C2%AE-Permeable-Supports,-Polycarbonate-(PC)-Membrane/p/3413</a>                                                             |
| Fluorescein isothiocyanate (FITC)-dextran (40 kDa)                        | FD40S, Sigma-Aldrich          | <a href="https://www.sigmaaldrich.com/catalog/product/sigma/fd40s?lang=it&amp;region=IT">https://www.sigmaaldrich.com/catalog/product/sigma/fd40s?lang=it&amp;region=IT</a>                                                                                                                                                                                                             |

|                                                                                 |                                   |                                                                                                                                                                                                                                                                                                                                                               |
|---------------------------------------------------------------------------------|-----------------------------------|---------------------------------------------------------------------------------------------------------------------------------------------------------------------------------------------------------------------------------------------------------------------------------------------------------------------------------------------------------------|
| Gram's crystal violet solution (1092180500)                                     | Merck                             | <a href="https://www.merckmillipore.com/IT/it/product/Grams-crystal-violet-solution_MDA_CHEM-109218">https://www.merckmillipore.com/IT/it/product/Grams-crystal-violet-solution_MDA_CHEM-109218</a>                                                                                                                                                           |
| SYBR Green Reaction Mix ()                                                      | 4385617, Thermo Fisher Scientific | <a href="https://www.thermofisher.com/order/catalog/product/4385617#/4385617">https://www.thermofisher.com/order/catalog/product/4385617#/4385617</a>                                                                                                                                                                                                         |
| Dual Luciferase Reporter Assay System                                           | E1980, Promega                    | <a href="https://ita.promega.com/products/luciferase-assays/reporter-assays/dual_luciferase-reporter-assay-system/?catNum=E1910">https://ita.promega.com/products/luciferase-assays/reporter-assays/dual_luciferase-reporter-assay-system/?catNum=E1910</a>                                                                                                   |
| Dual light luciferase and $\beta$ -galactosidase reporter gene assay system     | T1003, Thermo Fisher Scientific   | <a href="https://www.thermofisher.com/order/catalog/product/T1003#/T1003">https://www.thermofisher.com/order/catalog/product/T1003#/T1003</a>                                                                                                                                                                                                                 |
| RNeasy mini kits                                                                | 74104, Qiagen                     | <a href="https://www.qiagen.com/it/products/discovery-and-translational-research/dna-rna-purification/rna-purification/total-rna/rneasy-mini-kit/?clear=true#orderinginformation">https://www.qiagen.com/it/products/discovery-and-translational-research/dna-rna-purification/rna-purification/total-rna/rneasy-mini-kit/?clear=true#orderinginformation</a> |
| Maxwell RSC simplyRNA cells and tissue kits                                     | AS1390, Promega                   | <a href="https://ita.promega.com/products/nucleic-acid-extraction/rna/maxwell-rsc-simplyrna-cells-kit/?catNum=AS1390">https://ita.promega.com/products/nucleic-acid-extraction/rna/maxwell-rsc-simplyrna-cells-kit/?catNum=AS1390</a>                                                                                                                         |
| Random hexamers (High-Capacity cDNA Archive kits)                               | Applied Biosystems                | <a href="https://assets.thermofisher.com/TFS-Assets/LSG/manuals/4375222_High_Cap_cDNA_ReverseTranscriptKits_P I.pdf">https://assets.thermofisher.com/TFS-Assets/LSG/manuals/4375222_High_Cap_cDNA_ReverseTranscriptKits_P I.pdf</a>                                                                                                                           |
| TaqMan Fast Advanced Master Mix                                                 | 4444557, Applied Biosystems       | <a href="https://www.thermofisher.com/order/catalog/product/4444557#/4444557">https://www.thermofisher.com/order/catalog/product/4444557#/4444557</a>                                                                                                                                                                                                         |
| Maxwell RSC RNA FFPE kits                                                       | AS1440, Promega                   | <a href="https://ita.promega.com/products/nucleic-acid-extraction/rna/maxwell-rsc-rna-ffpe-kit/?catNum=AS1440">https://ita.promega.com/products/nucleic-acid-extraction/rna/maxwell-rsc-rna-ffpe-kit/?catNum=AS1440</a>                                                                                                                                       |
| Protease inhibitor R cocktail set III (EDTA free;)                              | 539134, Calbiochem                | <a href="https://www.merckmillipore.com/IT/it/product/Protease-Inhibitor-Cocktail-Set-III-EDTA-Free-Calbiochem,EMD_BIO-539134">https://www.merckmillipore.com/IT/it/product/Protease-Inhibitor-Cocktail-Set-III-EDTA-Free-Calbiochem,EMD_BIO-539134</a>                                                                                                       |
| Phosphatase inhibitors (cocktail 2)                                             | P5726, Sigma-Aldrich              | <a href="https://www.sigmaaldrich.com/content/dam/sigma-aldrich/docs/Sigma/Datasheet/5/p5726dat.pdf">https://www.sigmaaldrich.com/content/dam/sigma-aldrich/docs/Sigma/Datasheet/5/p5726dat.pdf</a>                                                                                                                                                           |
| Phosphatase inhibitors (cocktail 3)                                             | P0044, Sigma-Aldrich              | <a href="https://www.sigmaaldrich.com/content/dam/sigma-aldrich/docs/Sigma/Datasheet/10/p0044dat.pdf">https://www.sigmaaldrich.com/content/dam/sigma-aldrich/docs/Sigma/Datasheet/10/p0044dat.pdf</a>                                                                                                                                                         |
| DNase I                                                                         | 10104159001, Roche                | <a href="https://www.sigmaaldrich.com/catalog/product/roche/10104159001?lang=it&amp;region=IT">https://www.sigmaaldrich.com/catalog/product/roche/10104159001?lang=it&amp;region=IT</a>                                                                                                                                                                       |
| Protran nitrocellulose hybridization transfer membrane; pore size, 0.2 $\mu$ m; | 10600001, GE Healthcare           | <a href="https://www.sigmaaldrich.com/catalog/product/sigma/ge10600001?lang=it&amp;region=IT">https://www.sigmaaldrich.com/catalog/product/sigma/ge10600001?lang=it&amp;region=IT</a>                                                                                                                                                                         |
| Enhanced chemiluminescence (ECL)                                                | RPN2106, GE Healthcare            | <a href="https://www.sigmaaldrich.com/catalog/product/sigma/gerpn2106?lang=it&amp;region=IT">https://www.sigmaaldrich.com/catalog/product/sigma/gerpn2106?lang=it&amp;region=IT</a>                                                                                                                                                                           |

DOI [to be added]

|                                                       |                                      |                                                                                                                                                                                                                                   |
|-------------------------------------------------------|--------------------------------------|-----------------------------------------------------------------------------------------------------------------------------------------------------------------------------------------------------------------------------------|
| Super Signal West Femto Maximum Sensitivity Substrate | 34096, Thermo Fisher Scientific      | <a href="https://www.thermofisher.com/order/catalog/product/34096#/34096">https://www.thermofisher.com/order/catalog/product/34096#/34096</a>                                                                                     |
| Super Signal West Dura Extended Duration Substrate    | 34076, Thermo Fisher Scientific      | <a href="https://assets.thermofisher.com/TFS-Assets/LSG/manuals/MAN0011307_SupSig_West_Dura_Extend_Dur_Subs_UG.pdf">https://assets.thermofisher.com/TFS-Assets/LSG/manuals/MAN0011307_SupSig_West_Dura_Extend_Dur_Subs_UG.pdf</a> |
| Precision Plus Protein Standards Dual Colour;         | 161-0374, Bio-Rad                    | <a href="https://www.bio-rad.com/en-us/product/prestained-protein-standards">https://www.bio-rad.com/en-us/product/prestained-protein-standards</a>                                                                               |
| Glycine                                               | 3908.1, Roth                         | <a href="https://www.carlroth.com/com/en/glycine/glycine/p/3908.1">https://www.carlroth.com/com/en/glycine/glycine/p/3908.1</a>                                                                                                   |
| Normal donkey serum                                   | 017-000-1210, Jackson ImmunoResearch | <a href="https://www.jacksonimmuno.com/catalog/products/017-000-121">https://www.jacksonimmuno.com/catalog/products/017-000-121</a>                                                                                               |
| 8-well-Slides                                         | 80826, Ibidi                         | <a href="https://www.vitaris.com/shop/en/cell-culture/ibidi-open-slides/slide-8-well.html">https://www.vitaris.com/shop/en/cell-culture/ibidi-open-slides/slide-8-well.html</a>                                                   |
| BCA Protein Assay kits                                | 23225, Pierce                        | <a href="https://www.thermofisher.com/order/catalog/product/23225">https://www.thermofisher.com/order/catalog/product/23225</a>                                                                                                   |
